# Supplementary material for: A Microarray-Based Genetic Screen for Yeast Chronological Aging Factors
Source: PubMed Central journal article supplement (PMC2858703; doi:10.1371/journal.pgen.1000921), 2010-04-22
Supplement: pgen.1000921.s001.pdf [file pgen.1000921.s001.pdf]

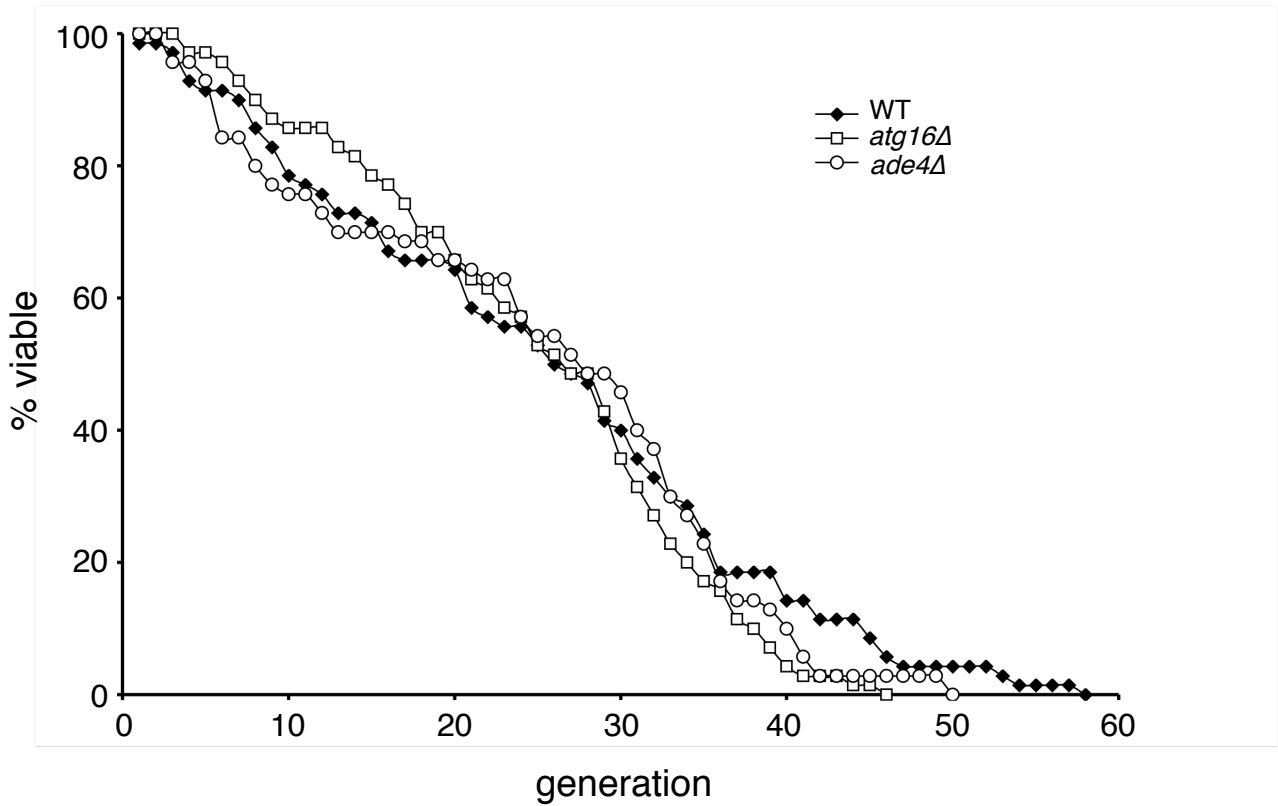

**Figure S1.** Replicative lifespan (RLS) measurements of WT (BY4741), *atg16Δ*, and *ade4Δ* strains. For each strain, a total of 70 mother cells were analyzed on SC media containing 2% glucose. Mean RLS values were as follows: WT (25.4), *atg16Δ* (25.2), and *ade4Δ* (24.9).
