# Supplementary material for: A Microarray-Based Genetic Screen for Yeast Chronological Aging Factors
Source: PLoS Genet. 2010 Apr 22;6(4):e1000921. doi: 10.1371/journal.pgen.1000921 (PMC2858703; doi:10.1371/journal.pgen.1000921)
Supplement: Table S5 — List of tested mutants with no effect on lifespan. (0.03 MB XLS) [file pgen.1000921.s006.xls]

## Sheet: normal
Table S5. List of tested mutants with no effect on lifespan
ORF	GENE	function
YAL017W	PSK1	PAS domain containing S/T protein kinases
YAL040C	CLN3	G1 cyclin involved in cell cycle progression
YBL052C	SAS3	histone acetyltransferase catalytic subunit of NuA3 complex
YBL053W	YBL053W	dubious ORF
YBL067C	UBP13	ubiquitin-specific protease that cleaves ubiquitin-protein fusions
YBL098W	BNA4	de novo biosynthesis of NAD
YBR057C	MUM2	meiotic DNA replication and sporulation;
YCL038C	ATG22	Autophagy
YCR011C	ADP1	putative ATP-dependent permease
YCR083W	TRX3	mitochondrial thioredoxin
YDL059C	RAD59	double-strand break repair
YDL118W	YDL118W	uncharacterized ORF
YDL119C	YDL119C	putative mitochondrial protein
YDR220C	YDR220C	dubious ORF
YDR296W	MHR1	homologous recombination in mitochrondria
YDR312W	SSF2	protein required for ribosomal large subunit maturation
YDR372C	VPS74	required for Golgi localization of glycosyltransferases
YDR411C	DFM1	ER localized derlin-like family member
YDR443C	SSN2	suppressor of SNf1
YDR485C	VPS72	Htz1p-binding component of the SWR1 complex
YDR519W	FPR2	membrane-bound peptidyl-prolyl cis-trans isomerase
YDR525W-A	SNA2	protein of unknown function
YER041W	YEN1	protein of unknown function
YER054C	GIP2	putative regulatory subunit of the protein phosphatase Glc7p
YER091C	MET6	cobalamin-independent methionine synthase
YFR032C	RPL29	protein component of the large (60S) ribosomal subunit
YGL003C	CDH1	cell-cycle regulated activator of the anaphase-promoting complex
YGR017W	YGR017W	protein of unknown function
YGR021W	YGR021W	protein of unknown function
YGR031W	YGR031W	protein of unknown function
YHL027W	RIM101	transcriptional repressor involved in response to pH and in cell wall construction
YIL032C	YIL032C	dubious ORF
YJL129C	TRK1	component of the Trk1p-Trk2p potassium transport system
YJL164C	TPK1	cAMP-dependent protein kinase catalytic subunit
YJL201W	ECM25	protein of unknown function
YJR140C	HIR3	subunit of the HIR complex, a nucleosome assembly complex
YKL128C	PMU1	putative phosphomutase
YLR020C	YEH2	steryl ester hydrolase
YLR154C	RNH203	ribonuclease H2 subunit
YLR210W	CLB4	B-type cyclin involved in cell cycle progression
YLR446W	YLR446W	protein of unknown function
YML090W	YML090W	dubious ORF
YMR287C	MSU1	3'-5' exoribonuclease, component of the mitochondrial degradosome
YNL071W	LAT1	pyruvate dehydrogenase complex
YNL099C	OCA1	Oxidant-induced Cell-cycle Arrest
YNL144C	YNL144C	Protein of unknown function
YNL197C	WHI3	RNA binding protein that sequesters CLN3 mRNA in cytoplasmic foci
YOR089C	VPS21	GTPase required for transport during endocytosis
YOR275C	RIM20	Regulator of IME2
YOR383C	FIT3	involved in the retention of siderophore-iron in the cell wall
YPL184C	MRN1	putative RNA binding protein
YPL203W	TPK2	cAMP-dependent protein kinase catalytic subunit
